# Supplementary material for: Human exposure to flame-retardants is associated with aberrant DNA methylation at imprinted genes in sperm
Source: Oxford University Press journal article supplement (doi:10.1093/eep/dvx003), 2017-01-01
Supplement: dvx003_supp.pdf [file dvx003_supp.pdf]

## Supplementary data

**Suppl. Figure 1. Distribution of normalized urinary concentrations of OPs in men aged 18 to 35 years old.** Raw urinary OP concentrations were normalized taking into account the specific gravity of the urine sample, as previously described<sup>44</sup>.

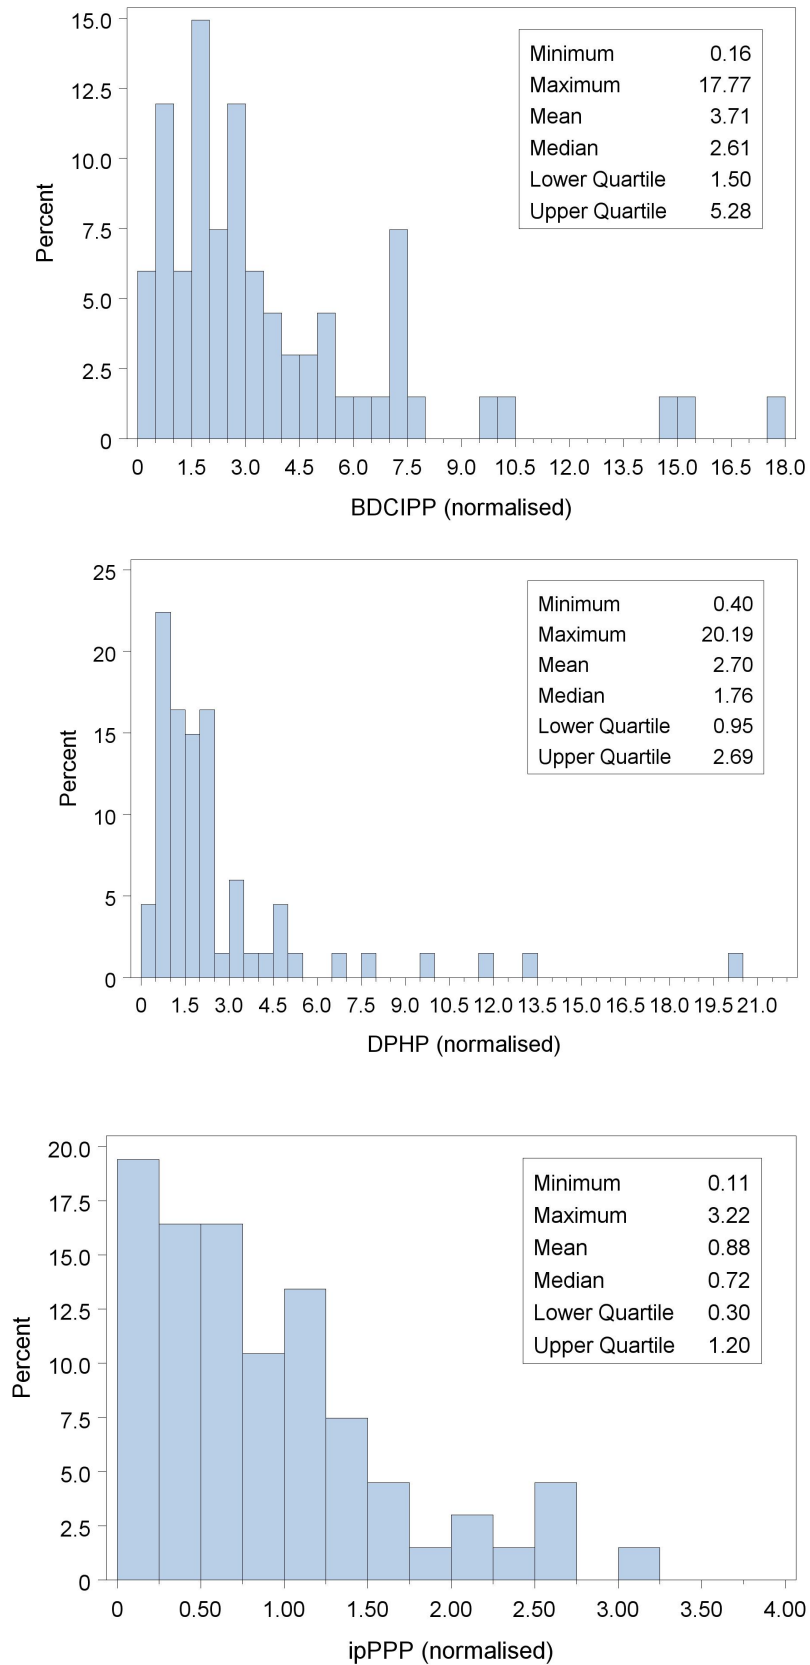

**Suppl. Table 1. Urinary concentrations of OPs in TIEGER volunteers.**

|               | <b>Raw OP levels</b>    |           |                           |              | <b>Normalized OP levels</b> |           |                           |              |
|---------------|-------------------------|-----------|---------------------------|--------------|-----------------------------|-----------|---------------------------|--------------|
|               | <b>mean<br/>(ng/ml)</b> | <b>SD</b> | <b>median<br/>(ng/ml)</b> | <b>range</b> | <b>mean<br/>(ng/ml)</b>     | <b>SD</b> | <b>median<br/>(ng/ml)</b> | <b>range</b> |
| <b>ipPPP</b>  | 0.7                     | 0.7       | 0.5                       | (0.1 - 3.2)  | 3.8                         | 3.6       | 2.6                       | (0.2 - 17.8) |
| <b>DPHP</b>   | 1.9                     | 2.6       | 1.2                       | (0.2 - 16.7) | 2.7                         | 3.3       | 1.8                       | (0.4 - 20.2) |
| <b>BDCIPP</b> | 2.5                     | 3.0       | 1.5                       | (0.1 - 16.6) | 1.0                         | 0.7       | 0.8                       | (0.1 - 3.2)  |

**Suppl. Table 2. Descriptives of sperm DNA methylation % by CpG site at imprinted genes.**

| Gene              | CpG site        | mean  | SD   | min   | max   |
|-------------------|-----------------|-------|------|-------|-------|
| <i>GRB10</i>      | GRB10_CPG1      | 0.80  | 1.14 | 0.00  | 7.43  |
|                   | GRB10_CPG2      | 2.83  | 0.97 | 1.65  | 8.83  |
|                   | GRB10_CPG3      | 1.24  | 1.03 | 0.00  | 7.34  |
|                   | GRB10_CPG4      | 1.20  | 1.05 | 0.00  | 6.99  |
|                   | GRB10_CPG5      | 2.75  | 0.97 | 1.87  | 8.57  |
|                   | GRB10_CPG6      | 2.12  | 0.95 | 1.62  | 8.03  |
| <i>H19</i>        | H19_CPG1        | 95.41 | 2.32 | 82.80 | 98.97 |
|                   | H19_CPG2        | 68.11 | 6.10 | 47.32 | 80.21 |
|                   | H19_CPG3        | 93.19 | 1.92 | 83.92 | 95.93 |
|                   | H19_CPG4        | 95.54 | 1.69 | 84.62 | 97.26 |
| <i>IGF2</i>       | IGF2_CPG1       | 91.90 | 1.40 | 83.59 | 93.41 |
|                   | IGF2_CPG2       | 92.84 | 2.35 | 85.89 | 98.25 |
|                   | IGF2_CPG3       | 97.01 | 2.24 | 88.71 | 100.0 |
| <i>MEG3</i>       | MEG3_CPG1       | 0.66  | 2.08 | 0.00  | 12.18 |
|                   | MEG3_CPG2       | 2.34  | 2.93 | 0.00  | 16.80 |
|                   | MEG3_CPG3       | 1.46  | 3.07 | 0.00  | 17.15 |
|                   | MEG3_CPG4       | 2.75  | 2.82 | 1.49  | 17.47 |
|                   | MEG3_CPG5       | 1.39  | 3.04 | 0.00  | 18.51 |
|                   | MEG3_CPG6       | 1.59  | 3.04 | 0.00  | 17.56 |
|                   | MEG3_CPG7       | 2.16  | 2.91 | 0.53  | 17.96 |
|                   | MEG3_CPG8       | 1.88  | 2.86 | 0.51  | 17.53 |
| <i>MEG3-IG</i>    | MEG3IG_CPG2     | 79.97 | 3.15 | 70.78 | 87.60 |
|                   | MEG3IG_CPG3     | 74.14 | 2.19 | 65.20 | 77.73 |
|                   | MEG3IG_CPG4     | 85.83 | 2.71 | 76.85 | 95.15 |
|                   | MEG3IG_CPG5     | 80.06 | 2.46 | 69.81 | 84.85 |
| <i>NDN</i>        | NDN_CPG1        | 1.80  | 1.81 | 0.55  | 11.65 |
|                   | NDN_CPG2        | 1.15  | 1.93 | 0.00  | 13.30 |
|                   | NDN_CPG3        | 1.21  | 1.21 | 0.00  | 9.62  |
|                   | NDN_CPG4        | 1.47  | 1.81 | 0.00  | 12.99 |
|                   | NDN_CPG5        | 1.47  | 1.78 | 0.00  | 10.72 |
|                   | NDN_CPG6        | 2.00  | 1.51 | 0.00  | 11.14 |
| <i>NNAT</i>       | NNAT_CPG1       | 0.65  | 1.91 | 0.00  | 10.80 |
|                   | NNAT_CPG2       | 1.94  | 1.60 | 0.00  | 10.19 |
|                   | NNAT_CPG3       | 3.03  | 1.76 | 0.00  | 11.27 |
| <i>PEG1/MEST</i>  | PEG1/MEST_CPG1  | 0.63  | 0.64 | 0.00  | 2.42  |
|                   | PEG1/MEST_CPG2  | 1.26  | 0.50 | 0.00  | 3.15  |
|                   | PEG1/MEST_CPG3  | 2.17  | 0.85 | 0.90  | 4.46  |
|                   | PEG1/MEST_CPG4  | 2.45  | 1.15 | 0.00  | 5.45  |
| <i>PEG3</i>       | PEG3_CPG1       | 1.44  | 1.34 | 0.37  | 7.93  |
|                   | PEG3_CPG2       | 1.56  | 1.48 | 0.62  | 8.61  |
|                   | PEG3_CPG3       | 1.54  | 1.49 | 0.35  | 8.66  |
|                   | PEG3_CPG4       | 1.10  | 1.26 | 0.00  | 7.06  |
|                   | PEG3_CPG5       | 1.65  | 1.68 | 0.46  | 9.40  |
|                   | PEG3_CPG6       | 0.99  | 1.52 | 0.00  | 8.10  |
|                   | PEG3_CPG7       | 1.88  | 1.43 | 0.72  | 8.89  |
|                   | PEG3_CPG8       | 0.88  | 1.29 | 0.00  | 6.91  |
|                   | PEG3_CPG9       | 2.19  | 1.46 | 1.18  | 9.10  |
|                   | PEG3_CPG10      | 1.94  | 1.31 | 0.51  | 7.65  |
| <i>PLAGL1</i>     | PLAGL1_CPG1     | 4.05  | 5.86 | 0.41  | 27.88 |
|                   | PLAGL1_CPG2     | 3.92  | 5.86 | 0.00  | 27.67 |
|                   | PLAGL1_CPG3     | 4.86  | 5.83 | 1.33  | 27.83 |
|                   | PLAGL1_CPG4     | 4.12  | 5.77 | 0.00  | 28.31 |
|                   | PLAGL1_CPG5     | 4.00  | 5.51 | 0.00  | 25.71 |
|                   | PLAGL1_CPG6     | 3.52  | 5.16 | 0.00  | 24.65 |
| <i>SGCE/PEG10</i> | SGCE/PEG10_CPG1 | 3.30  | 3.32 | 1.51  | 19.96 |
|                   | SGCE/PEG10_CPG2 | 1.69  | 3.47 | 0.00  | 18.46 |
|                   | SGCE/PEG10_CPG3 | 3.44  | 3.59 | 0.00  | 20.36 |
|                   | SGCE/PEG10_CPG4 | 3.90  | 3.31 | 1.01  | 19.91 |
|                   | SGCE/PEG10_CPG5 | 2.32  | 3.53 | 0.00  | 19.46 |
|                   | SGCE/PEG10_CPG6 | 4.11  | 3.70 | 0.00  | 21.82 |
| <i>SNRPN</i>      | SNRPN_CPG1      | 2.49  | 1.05 | 0.98  | 8.16  |
|                   | SNRPN_CPG2      | 1.54  | 0.95 | 0.36  | 7.04  |
|                   | SNRPN_CPG3      | 1.76  | 1.10 | 1.02  | 7.37  |
|                   | SNRPN_CPG4      | 0.68  | 0.88 | 0.00  | 5.86  |

**Suppl. Table 3. Associations between normalized OPs and DNA methylation at CpG sites of imprinted genes: extended results.**

Multivariable robust linear regression: adjusted for age and BMI status. Results are shown by increasing p-values; p<0.05 are marked in bold. \* Indicates the associations that are still significant after D/AP correction, given a nominal alpha-level of 0.0031.

| Gene             | CpG site       | BDCIPP        |                | DHP           |                | ipPPP         |                |
|------------------|----------------|---------------|----------------|---------------|----------------|---------------|----------------|
|                  |                | beta          | p-value        | beta          | p-value        | beta          | p-value        |
| <i>GRB10</i>     | GRB10_CPG1     | 0.034         | 0.5703         | -0.038        | 0.6280         | 0.091         | 0.1178         |
|                  | GRB10_CPG2     | 0.004         | 0.7620         | 0.000         | 0.9822         | 0.019         | 0.2286         |
|                  | GRB10_CPG3     | 0.034         | 0.3285         | -0.002        | 0.9720         | 0.035         | 0.4030         |
|                  | GRB10_CPG4     | 0.100         | 0.0636         | -0.004        | 0.9473         | 0.014         | 0.8041         |
|                  | GRB10_CPG5     | <b>0.029</b>  | <b>0.0305</b>  | <b>0.053</b>  | <b>0.0022*</b> | 0.015         | 0.3399         |
|                  | GRB10_CPG6     | 0.010         | 0.2463         | 0.015         | 0.1862         | <b>0.021</b>  | <b>0.0244</b>  |
| <i>H19</i>       | H19_CPG1       | 0.002         | 0.3672         | 0.001         | 0.7236         | <b>-0.005</b> | <b>0.0438</b>  |
|                  | H19_CPG2       | -0.020        | 0.0482         | -0.010        | 0.4345         | 0.001         | 0.9154         |
|                  | H19_CPG3       | <b>-0.005</b> | <b>0.0026*</b> | -0.004        | 0.0741         | -0.001        | 0.6010         |
|                  | H19_CPG4       | -0.002        | 0.1592         | -0.002        | 0.3178         | -0.000        | 0.8466         |
| <i>IGF2</i>      | IGF2_CPG1      | -0.001        | 0.3374         | -0.000        | 0.8195         | 0.000         | 0.6913         |
|                  | IGF2_CPG2      | -0.003        | 0.3860         | 0.001         | 0.7963         | 0.003         | 0.4130         |
|                  | IGF2_CPG3      | 0.000         | 0.8796         | -0.001        | 0.8002         | -0.001        | 0.7465         |
| <i>MEG3</i>      | MEG3_CPG1      | 0.031         | 0.2420         | <b>0.082</b>  | <b>0.0107</b>  | 0.055         | 0.0742         |
|                  | MEG3_CPG2      | 0.032         | 0.2606         | <b>0.083</b>  | <b>0.0337</b>  | <b>0.120</b>  | <b>0.0003*</b> |
|                  | MEG3_CPG3      | 0.043         | 0.2150         | <b>0.079</b>  | <b>0.0468</b>  | <b>0.102</b>  | <b>0.0036</b>  |
|                  | MEG3_CPG4      | 0.003         | 0.8872         | <b>0.053</b>  | <b>0.0203</b>  | <b>0.070</b>  | <b>0.0008*</b> |
|                  | MEG3_CPG5      | -0.007        | 0.8206         | 0.033         | 0.4222         | <b>0.117</b>  | <b>0.0021*</b> |
|                  | MEG3_CPG6      | 0.009         | 0.8284         | 0.077         | 0.1334         | <b>0.111</b>  | <b>0.0291</b>  |
|                  | MEG3_CPG7      | 0.022         | 0.2760         | 0.041         | 0.0924         | <b>0.058</b>  | <b>0.0111</b>  |
|                  | MEG3_CPG8      | 0.010         | 0.7770         | 0.067         | 0.1258         | <b>0.112</b>  | <b>0.0060</b>  |
| <i>MEG3-IG</i>   | MEG3IG_CPG2    | -0.006        | 0.1215         | <b>-0.012</b> | <b>0.0061</b>  | -0.003        | 0.5027         |
|                  | MEG3IG_CPG3    | -0.004        | 0.1445         | -0.005        | 0.1753         | 0.001         | 0.7675         |
|                  | MEG3IG_CPG4    | -0.001        | 0.6569         | -0.004        | 0.2651         | 0.001         | 0.7886         |
|                  | MEG3IG_CPG5    | <b>-0.007</b> | <b>0.0021*</b> | -0.006        | 0.0597         | -0.001        | 0.7790         |
| <i>NDN</i>       | NDN_CPG1       | 0.015         | 0.6162         | 0.006         | 0.8810         | <b>0.111</b>  | <b>0.0013*</b> |
|                  | NDN_CPG2       | -0.018        | 0.6419         | -0.010        | 0.8387         | 0.028         | 0.5323         |
|                  | NDN_CPG3       | 0.004         | 0.8364         | 0.006         | 0.8266         | 0.034         | 0.1456         |
|                  | NDN_CPG4       | 0.036         | 0.3541         | 0.023         | 0.6380         | <b>0.097</b>  | <b>0.0333</b>  |
|                  | NDN_CPG5       | 0.026         | 0.5858         | -0.005        | 0.9306         | <b>0.132</b>  | <b>0.0134</b>  |
|                  | NDN_CPG6       | 0.026         | 0.2521         | 0.029         | 0.3282         | <b>0.061</b>  | <b>0.0140</b>  |
| <i>NNAT</i>      | NNAT_CPG1      | 0.033         | 0.4708         | -0.001        | 0.9927         | <b>0.105</b>  | <b>0.0471</b>  |
|                  | NNAT_CPG2      | 0.014         | 0.7343         | 0.011         | 0.8305         | 0.034         | 0.4635         |
|                  | NNAT_CPG3      | 0.012         | 0.7028         | <b>0.087</b>  | <b>0.0343</b>  | 0.069         | 0.0568         |
| <i>PEG1/MEST</i> | PEG1/MEST_CPG1 | -0.019        | 0.7191         | -0.024        | 0.7258         | -0.001        | 0.9886         |
|                  | PEG1/MEST_CPG2 | -0.010        | 0.6558         | -0.000        | 0.9992         | -0.013        | 0.6195         |
|                  | PEG1/MEST_CPG3 | 0.016         | 0.6647         | 0.038         | 0.3964         | 0.011         | 0.7880         |
|                  | PEG1/MEST_CPG4 | 0.008         | 0.8612         | 0.038         | 0.4893         | -0.010        | 0.8414         |
| <i>PEG3</i>      | PEG3_CPG1      | 0.006         | 0.8430         | 0.024         | 0.4876         | 0.051         | 0.0934         |
|                  | PEG3_CPG10     | 0.028         | 0.3101         | 0.043         | 0.1924         | 0.039         | 0.1936         |
|                  | PEG3_CPG2      | -0.012        | 0.6930         | 0.001         | 0.9867         | 0.039         | 0.2497         |
|                  | PEG3_CPG3      | 0.020         | 0.4231         | 0.036         | 0.2602         | 0.052         | 0.0862         |
|                  | PEG3_CPG4      | 0.013         | 0.7290         | 0.040         | 0.3781         | 0.068         | 0.1131         |
|                  | PEG3_CPG5      | 0.003         | 0.9074         | 0.034         | 0.3424         | 0.053         | 0.0915         |
|                  | PEG3_CPG6      | 0.060         | 0.2457         | 0.077         | 0.2221         | 0.104         | 0.0771         |
|                  | PEG3_CPG7      | 0.031         | 0.2389         | 0.044         | 0.1560         | 0.053         | 0.0696         |
|                  | PEG3_CPG8      | 0.029         | 0.5825         | 0.026         | 0.6833         | 0.058         | 0.3292         |
|                  | PEG3_CPG9      | 0.015         | 0.5011         | 0.016         | 0.5626         | 0.036         | 0.1532         |
| <i>PLAGL1</i>    | PLAGL1_CPG1    | -0.076        | 0.4178         | <b>0.257</b>  | <b>0.0338</b>  | 0.133         | 0.2503         |
|                  | PLAGL1_CPG2    | -0.051        | 0.6238         | <b>0.264</b>  | <b>0.0385</b>  | 0.157         | 0.1993         |
|                  | PLAGL1_CPG3    | -0.069        | 0.3110         | 0.105         | 0.2130         | 0.094         | 0.2225         |
|                  | PLAGL1_CPG4    | -0.065        | 0.5197         | <b>0.290</b>  | <b>0.0203</b>  | 0.166         | 0.1605         |
|                  | PLAGL1_CPG5    | -0.039        | 0.6867         | <b>0.307</b>  | <b>0.0045</b>  | 0.134         | 0.2181         |
|                  | PLAGL1_CPG6    | -0.099        | 0.2677         | 0.173         | 0.1105         | 0.084         | 0.4225         |
| <i>SGCE</i>      | SGCE_CPG1      | -0.017        | 0.5135         | 0.025         | 0.4241         | <b>0.084</b>  | <b>0.0047</b>  |
|                  | SGCE_CPG2      | 0.058         | 0.4657         | <b>0.230</b>  | <b>0.0180</b>  | 0.169         | 0.0698         |
|                  | SGCE_CPG3      | -0.017        | 0.6414         | 0.057         | 0.2066         | 0.076         | 0.0638         |
|                  | SGCE_CPG4      | 0.014         | 0.7424         | 0.064         | 0.2120         | <b>0.092</b>  | <b>0.0480</b>  |
|                  | SGCE_CPG5      | 0.067         | 0.4329         | 0.120         | 0.2506         | <b>0.192</b>  | <b>0.0408</b>  |
|                  | SGCE_CPG6      | 0.022         | 0.6445         | <b>0.121</b>  | <b>0.0226</b>  | 0.090         | 0.1014         |
| <i>SNRPN</i>     | SNRPN_CPG1     | 0.039         | 0.1098         | 0.051         | 0.0742         | <b>0.073</b>  | <b>0.0072</b>  |
|                  | SNRPN_CPG2     | 0.034         | 0.2141         | 0.053         | 0.0944         | <b>0.088</b>  | <b>0.0014*</b> |
|                  | SNRPN_CPG3     | 0.023         | 0.3177         | 0.056         | 0.0519         | <b>0.052</b>  | <b>0.0442</b>  |
|                  | SNRPN_CPG4     | 0.063         | 0.1455         | 0.103         | 0.0670         | <b>0.125</b>  | <b>0.0104</b>  |

**Suppl. Table 4. Associations between raw values of OPs and DNA methylation at CpG sites of imprinted genes.**

Multivariable robust linear regression: adjusted for age and BMI status. Results are shown by increasing p-values; p<0.05 are marked in bold. \* Indicates the associations that are still significant after D/AP correction, given a nominal alpha-level of 0.0031.

| Gene             | CpG site       | BDCIPP        |                | DHP          |               | ipPPP         |               |
|------------------|----------------|---------------|----------------|--------------|---------------|---------------|---------------|
|                  |                | beta          | p-value        | beta         | p-value       | beta          | p-value       |
| <i>IGF2</i>      | IGF2_CPG1      | 0.000         | 0.9609         | 0.001        | 0.4236        | 0.082         | 0.0534        |
|                  | IGF2_CPG2      | 0.000         | 0.9135         | 0.003        | 0.3670        | 0.018         | 0.1414        |
|                  | IGF2_CPG3      | 0.000         | 0.9740         | -0.001       | 0.7520        | 0.042         | 0.1642        |
| <i>GRB10</i>     | GRB10_CPG1     | 0.065         | 0.1724         | 0.026        | 0.6624        | 0.031         | 0.4559        |
|                  | GRB10_CPG2     | 0.009         | 0.4806         | 0.008        | 0.5924        | 0.015         | 0.2506        |
|                  | GRB10_CPG3     | 0.049         | 0.1257         | 0.029        | 0.4173        | 0.014         | 0.0579        |
|                  | GRB10_CPG4     | <b>0.114</b>  | <b>0.0169</b>  | 0.033        | 0.5091        | <b>-0.004</b> | <b>0.0299</b> |
|                  | GRB10_CPG5     | <b>0.031</b>  | <b>0.0086</b>  | <b>0.035</b> | <b>0.0098</b> | -0.002        | 0.8001        |
|                  | GRB10_CPG6     | 0.011         | 0.1908         | 0.012        | 0.1509        | -0.001        | 0.4382        |
| <i>H19</i>       | H19_CPG1       | 0.000         | 0.8025         | -0.001       | 0.7491        | -0.001        | 0.4544        |
|                  | H19_CPG2       | <b>-0.019</b> | <b>0.0415</b>  | -0.010       | 0.3113        | 0.001         | 0.2909        |
|                  | H19_CPG3       | <b>-0.004</b> | <b>0.0022*</b> | -0.003       | 0.0683        | 0.003         | 0.2578        |
|                  | H19_CPG4       | <b>-0.002</b> | <b>0.0487</b>  | -0.002       | 0.1610        | -0.001        | 0.7280        |
| <i>MEG3</i>      | MEG3_CPG1      | 0.005         | 0.8231         | 0.025        | 0.3335        | 0.012         | 0.5894        |
|                  | MEG3_CPG2      | 0.012         | 0.6334         | 0.032        | 0.2375        | <b>0.059</b>  | <b>0.0221</b> |
|                  | MEG3_CPG3      | 0.031         | 0.2972         | 0.047        | 0.1401        | <b>0.036</b>  | <b>0.0443</b> |
|                  | MEG3_CPG4      | -0.007        | 0.6465         | 0.019        | 0.2675        | <b>0.033</b>  | <b>0.0314</b> |
|                  | MEG3_CPG5      | -0.017        | 0.5083         | 0.002        | 0.9509        | 0.043         | 0.1152        |
|                  | MEG3_CPG6      | -0.009        | 0.8001         | 0.030        | 0.4526        | 0.049         | 0.1910        |
|                  | MEG3_CPG7      | 0.009         | 0.5891         | 0.016        | 0.3751        | 0.026         | 0.1230        |
|                  | MEG3_CPG8      | -0.013        | 0.6706         | 0.019        | 0.5718        | 0.036         | 0.2465        |
| <i>MEG3-IG</i>   | MEG3IG_CPG2    | -0.003        | 0.3323         | -0.005       | 0.1530        | -0.000        | 0.9388        |
|                  | MEG3IG_CPG3    | -0.000        | 0.9290         | 0.001        | 0.8297        | 0.003         | 0.2299        |
|                  | MEG3IG_CPG4    | 0.001         | 0.7349         | 0.000        | 0.8655        | 0.002         | 0.3538        |
|                  | MEG3IG_CPG5    | -0.004        | 0.0842         | -0.001       | 0.7826        | 0.001         | 0.5576        |
| <i>NDN</i>       | NDN_CPG1       | 0.018         | 0.4866         | 0.013        | 0.6661        | <b>0.062</b>  | <b>0.0164</b> |
|                  | NDN_CPG2       | -0.014        | 0.6874         | -0.004       | 0.9087        | 0.015         | 0.6429        |
|                  | NDN_CPG3       | -0.003        | 0.8578         | -0.005       | 0.7979        | 0.013         | 0.4263        |
|                  | NDN_CPG4       | 0.036         | 0.2853         | 0.021        | 0.5830        | 0.037         | 0.0933        |
|                  | NDN_CPG5       | 0.022         | 0.5871         | 0.000        | 0.9986        | 0.073         | 0.0779        |
|                  | NDN_CPG6       | 0.023         | 0.2492         | 0.018        | 0.4245        | 0.033         | 0.0762        |
| <i>NNAT</i>      | NNAT_CPG1      | 0.041         | 0.3182         | 0.016        | 0.7228        | 0.075         | 0.0698        |
|                  | NNAT_CPG2      | 0.018         | 0.6099         | 0.012        | 0.7634        | 0.024         | 0.4903        |
|                  | NNAT_CPG3      | 0.015         | 0.6002         | <b>0.077</b> | <b>0.0237</b> | 0.046         | 0.1027        |
| <i>PEG1/MEST</i> | PEG1/MEST_CPG1 | -0.024        | 0.6092         | -0.024       | 0.6402        | -0.009        | 0.8505        |
|                  | PEG1/MEST_CPG2 | -0.009        | 0.6607         | -0.002       | 0.9371        | -0.009        | 0.6414        |
|                  | PEG1/MEST_CPG3 | 0.041         | 0.1886         | 0.051        | 0.1301        | 0.030         | 0.3460        |
|                  | PEG1/MEST_CPG4 | 0.030         | 0.4373         | 0.053        | 0.2220        | 0.021         | 0.6020        |
| <i>PEG3</i>      | PEG3_CPG1      | 0.006         | 0.8097         | 0.017        | 0.5239        | 0.031         | 0.1880        |
|                  | PEG3_CPG10     | 0.030         | 0.1876         | 0.036        | 0.1494        | 0.031         | 0.1484        |
|                  | PEG3_CPG2      | -0.005        | 0.8648         | 0.006        | 0.8304        | 0.026         | 0.2869        |
|                  | PEG3_CPG3      | 0.014         | 0.5216         | 0.018        | 0.4684        | 0.028         | 0.2289        |
|                  | PEG3_CPG4      | 0.019         | 0.5499         | 0.036        | 0.3130        | 0.049         | 0.1304        |
|                  | PEG3_CPG5      | 0.012         | 0.6110         | 0.031        | 0.2346        | 0.041         | 0.0820        |
|                  | PEG3_CPG6      | 0.058         | 0.1901         | 0.060        | 0.2074        | 0.075         | 0.0944        |
|                  | PEG3_CPG7      | 0.027         | 0.2129         | 0.031        | 0.1791        | 0.032         | 0.1416        |
|                  | PEG3_CPG8      | 0.033         | 0.4600         | 0.029        | 0.5606        | 0.043         | 0.3254        |
|                  | PEG3_CPG9      | 0.014         | 0.4668         | 0.012        | 0.5637        | 0.023         | 0.2136        |
| <i>PLAGL1</i>    | PLAGL1_CPG1    | -0.107        | 0.1799         | 0.079        | 0.3991        | 0.018         | 0.8173        |
|                  | PLAGL1_CPG2    | -0.083        | 0.3516         | 0.092        | 0.3546        | 0.037         | 0.6783        |
|                  | PLAGL1_CPG3    | -0.066        | 0.2601         | 0.047        | 0.4650        | 0.039         | 0.4997        |
|                  | PLAGL1_CPG4    | -0.076        | 0.3886         | 0.132        | 0.1719        | 0.058         | 0.4978        |
|                  | PLAGL1_CPG5    | -0.073        | 0.3967         | 0.125        | 0.1575        | 0.031         | 0.7068        |
|                  | PLAGL1_CPG6    | -0.112        | 0.1419         | 0.056        | 0.5225        | 0.007         | 0.9296        |
| <i>SGCE</i>      | SGCE_CPG1      | -0.020        | 0.3840         | 0.007        | 0.7845        | 0.034         | 0.0948        |
|                  | SGCE_CPG2      | 0.022         | 0.7528         | 0.107        | 0.1522        | 0.023         | 0.2704        |
|                  | SGCE_CPG3      | -0.036        | 0.2662         | 0.007        | 0.8260        | 0.025         | 0.4057        |
|                  | SGCE_CPG4      | -0.002        | 0.9610         | 0.025        | 0.5248        | 0.039         | 0.2825        |
|                  | SGCE_CPG5      | 0.031         | 0.6749         | 0.051        | 0.5366        | 0.085         | 0.2218        |
|                  | SGCE_CPG6      | -0.000        | 0.9917         | 0.049        | 0.2502        | 0.032         | 0.4298        |
| <i>SNRPN</i>     | SNRPN_CPG1     | 0.029         | 0.1672         | 0.029        | 0.1762        | 0.039         | 0.0510        |
|                  | SNRPN_CPG2     | 0.028         | 0.2230         | 0.034        | 0.1631        | <b>0.050</b>  | <b>0.0154</b> |
|                  | SNRPN_CPG3     | 0.024         | 0.2344         | <b>0.043</b> | <b>0.0496</b> | 0.035         | 0.0652        |
|                  | SNRPN_CPG4     | 0.062         | 0.0894         | 0.076        | 0.0681        | <b>0.081</b>  | <b>0.0251</b> |

**Suppl. Table 5. Associations between total motile sperm count or motility and DNA methylation at imprinted genes**

Spearman correlation coefficients are shown. Significant results are shown in bold.

\* If significant and if DNA methylation at this site was also associated with ipPPP exposure.

| Gene       | CpG site       | TMC             |               | Motility        |               |
|------------|----------------|-----------------|---------------|-----------------|---------------|
|            |                | rho             | p-value       | rho             | p-value       |
| GRB10      | GRB10_CPG1     | -0.01516        | 0.9085        | -0.10239        | 0.4363        |
|            | GRB10_CPG2     | -0.06947        | 0.5979        | 0.01601         | 0.9034        |
|            | GRB10_CPG3     | <b>-0.25947</b> | <b>0.0453</b> | -0.16911        | 0.1965        |
|            | GRB10_CPG4     | -0.11010        | 0.4024        | -0.02440        | 0.8532        |
|            | GRB10_CPG5     | -0.04074        | 0.7573        | 0.00165         | 0.9900        |
|            | GRB10_CPG6     | -0.19859        | 0.1282        | -0.20683        | 0.1128        |
| H19        | H19_CPG1       | 0.13360         | 0.2966        | 0.11185         | 0.3828        |
|            | H19_CPG2       | 0.08101         | 0.5279        | -0.00384        | 0.9762        |
|            | H19_CPG3       | 0.16496         | 0.1964        | 0.15972         | 0.2112        |
|            | H19_CPG4       | <b>0.27906</b>  | <b>0.0268</b> | 0.09603         | 0.4541        |
| IGF2       | IGF2_CPG1      | 0.10189         | 0.4307        | 0.12052         | 0.3508        |
|            | IGF2_CPG2      | 0.15236         | 0.2371        | 0.24042         | 0.0598        |
|            | IGF2_CPG3      | 0.13382         | 0.2998        | 0.21262         | 0.0971        |
| MEG3       | MEG3_CPG1      | -0.21121        | 0.0887        | 0.00043         | 0.9973        |
|            | MEG3_CPG2*     | <b>-0.32750</b> | <b>0.0073</b> | -0.06859        | 0.5842        |
|            | MEG3_CPG3      | -0.17985        | 0.1485        | -0.09481        | 0.4489        |
|            | MEG3_CPG4*     | <b>-0.40661</b> | <b>0.0007</b> | -0.16590        | 0.1831        |
|            | MEG3_CPG5*     | <b>-0.44208</b> | <b>0.0002</b> | -0.21533        | 0.0825        |
|            | MEG3_CPG6*     | <b>-0.39876</b> | <b>0.0009</b> | -0.18270        | 0.1420        |
|            | MEG3_CPG7*     | <b>-0.35529</b> | <b>0.0034</b> | <b>-0.24640</b> | <b>0.0461</b> |
|            | MEG3_CPG8*     | <b>-0.29132</b> | <b>0.0176</b> | -0.13552        | 0.2779        |
| MEG-IG     | MEG3IG_CPG2    | 0.08492         | 0.4978        | 0.05635         | 0.6532        |
|            | MEG3IG_CPG3    | 0.19555         | 0.1156        | 0.11897         | 0.3414        |
|            | MEG3IG_CPG4    | -0.06497        | 0.6043        | 0.00559         | 0.9644        |
|            | MEG3IG_CPG5    | 0.12123         | 0.3322        | 0.06054         | 0.6292        |
| NDN        | NDN_CPG1       | -0.05635        | 0.6583        | -0.12106        | 0.3406        |
|            | NDN_CPG2       | -0.20154        | 0.1103        | -0.19435        | 0.1238        |
|            | NDN_CPG3       | -0.22037        | 0.0802        | -0.18777        | 0.1373        |
|            | NDN_CPG4       | -0.19684        | 0.1190        | -0.03112        | 0.8072        |
|            | NDN_CPG5*      | <b>-0.27435</b> | <b>0.0282</b> | 0.02524         | 0.8431        |
|            | NDN_CPG6       | -0.12359        | 0.3306        | -0.03647        | 0.7748        |
| NNAT       | NNAT_CPG1      | -0.08511        | 0.5291        | -0.23354        | 0.0804        |
|            | NNAT_CPG2      | -0.24402        | 0.0674        | -0.18806        | 0.1612        |
|            | NNAT_CPG3      | <b>-0.26989</b> | <b>0.0423</b> | 0.10408         | 0.4410        |
| PEG1/MEST  | PEG1/MEST_CPG1 | -0.03734        | 0.7714        | <b>0.27792</b>  | <b>0.0274</b> |
|            | PEG1/MEST_CPG2 | -0.04543        | 0.7237        | -0.06346        | 0.6212        |
|            | PEG1/MEST_CPG3 | 0.11788         | 0.3575        | 0.13488         | 0.2919        |
|            | PEG1/MEST_CPG4 | 0.09397         | 0.4638        | 0.07448         | 0.5618        |
| PEG3       | PEG3_CPG1      | <b>-0.36818</b> | <b>0.0024</b> | -0.20984        | 0.0908        |
|            | PEG3_CPG2      | <b>-0.33532</b> | <b>0.0059</b> | <b>-0.27167</b> | <b>0.0273</b> |
|            | PEG3_CPG3      | <b>-0.31424</b> | <b>0.0102</b> | -0.21333        | 0.0855        |
|            | PEG3_CPG4      | <b>-0.27439</b> | <b>0.0258</b> | -0.17258        | 0.1658        |
|            | PEG3_CPG5      | <b>-0.38614</b> | <b>0.0014</b> | <b>-0.24467</b> | <b>0.0477</b> |
|            | PEG3_CPG6      | <b>-0.33170</b> | <b>0.0065</b> | -0.23797        | 0.0543        |
|            | PEG3_CPG7      | <b>-0.24264</b> | <b>0.0496</b> | -0.23552        | 0.0570        |
|            | PEG3_CPG8      | -0.20667        | 0.0959        | <b>-0.25008</b> | <b>0.0429</b> |
|            | PEG3_CPG9      | <b>-0.32743</b> | <b>0.0073</b> | <b>-0.29958</b> | <b>0.0145</b> |
|            | PEG3_CPG10     | <b>-0.28393</b> | <b>0.0209</b> | -0.21286        | 0.0862        |
| PLAGL1     | PLAGL1_CPG1    | <b>-0.29084</b> | <b>0.0207</b> | <b>-0.36203</b> | <b>0.0036</b> |
|            | PLAGL1_CPG2    | <b>-0.29927</b> | <b>0.0172</b> | <b>-0.36739</b> | <b>0.0031</b> |
|            | PLAGL1_CPG3    | <b>-0.32779</b> | <b>0.0087</b> | <b>-0.45574</b> | <b>0.0002</b> |
|            | PLAGL1_CPG4    | <b>-0.26953</b> | <b>0.0327</b> | <b>-0.38792</b> | <b>0.0017</b> |
|            | PLAGL1_CPG5    | <b>-0.26475</b> | <b>0.0360</b> | <b>-0.36754</b> | <b>0.0030</b> |
|            | PLAGL1_CPG6    | -0.22474        | 0.0766        | <b>-0.44046</b> | <b>0.0003</b> |
| SGCE/PEG10 | SGCE_CPG1*     | <b>-0.29062</b> | <b>0.0188</b> | <b>-0.25194</b> | <b>0.0429</b> |
|            | SGCE_CPG2      | -0.21558        | 0.0846        | -0.11384        | 0.3666        |
|            | SGCE_CPG3      | <b>-0.26013</b> | <b>0.0364</b> | -0.02584        | 0.8381        |
|            | SGCE_CPG4      | -0.21511        | 0.0853        | -0.11354        | 0.3678        |
|            | SGCE_CPG5      | <b>-0.27673</b> | <b>0.0256</b> | -0.18885        | 0.1319        |
|            | SGCE_CPG6      | -0.21348        | 0.0877        | -0.08853        | 0.4831        |
| SNRPN      | SNRPN_CPG1*    | <b>-0.24920</b> | <b>0.0453</b> | -0.14167        | 0.2603        |
|            | SNRPN_CPG2*    | <b>-0.24555</b> | <b>0.0487</b> | -0.04013        | 0.7510        |
|            | SNRPN_CPG3     | -0.25936        | 0.0369        | -0.20785        | 0.0966        |
|            | SNRPN_CPG4*    | <b>-0.27881</b> | <b>0.0245</b> | -0.17219        | 0.1702        |
